# Supplementary material for: Unveiling the ion sensing capabailities of ‘click’ derived chalcone-tailored 1,2,3-triazolic isomers for Pb( ii ) and Cu( ii ) ions: DFT analysis
Source: Royal Society of Chemistry journal article supplement (doi:10.1039/d4ra01471e), 2024-01-01
Supplement: d4ra01471e1.pdf [file d4ra01471e1.pdf]

### **Supporting Information**

**Riddima Singh,<sup>a</sup> Gurleen Singh,<sup>a</sup> Nancy George,<sup>a</sup> Gurjaspreet Singh,<sup>b</sup> Pooja Malik,<sup>b</sup>  
Harminder Singh,<sup>a</sup> Gurpreet Kaur,<sup>c,#</sup> Jandeep Singh,<sup>a,\*</sup>**

<sup>a</sup> School of Chemical Engineering and Physical Sciences, Lovely Professional University,  
Phagwara-144411 (Punjab)

<sup>b</sup> Department of Chemistry and Centre of Advanced Studies in Chemistry, Panjab  
University, Chandigarh-160014

<sup>c</sup> Department of Chemistry, GGN Khalsa College, Civil lines, Ludhiana-141001 (Punjab)

**\*,# Corresponding Authors**

**Contact details:**

**[\\*singhjandeep@gmail.com](mailto:*singhjandeep@gmail.com)**

**Contents:**

**Figure S1:** IR spectrum of chalcone 4

**Figure S2:** IR spectrum of chalcone 7

**Figure S3:** IR spectrum of alkyne 5

**Figure S4:** IR spectrum of alkyne 8

**Figure S5:** IR spectrum of benzyl azide 10

**Figure S6:** IR spectrum of probe 6

**Figure S7:** IR spectrum of probe 9

**Figure S8:**  $^1\text{H}$  NMR spectrum of alkyne 5

**Figure S9:**  $^{13}\text{C}$  NMR spectrum of alkyne 5

**Figure S10:**  $^1\text{H}$  NMR spectrum of alkyne 8

**Figure S11:**  $^{13}\text{C}$  NMR spectrum of alkyne 8

**Figure S12:**  $^1\text{H}$  NMR spectrum of benzyl azide 10

**Figure S13:**  $^{13}\text{C}$  NMR spectrum of benzyl azide 10

**Figure S14:**  $^1\text{H}$  NMR spectrum of probe 6

**Figure S15:**  $^{13}\text{C}$  NMR spectrum of probe 6

**Figure S16:**  $^1\text{H}$  NMR spectrum of probe 9

**Figure S17:**  $^{13}\text{C}$  NMR spectrum of probe 9

**Figure S18:** Mass spectrum of probe 6

**Figure S19:** Mass spectrum of probe 9

**Figure S20:** Time dependent spectra of probe 6-Pb(II) complex displaying the trend in the absorption.

**Figure S21:** Time dependent spectra of probe 6-Cu(II) complex displaying the trend in the absorption.

**Figure S22:** Time dependent spectra of probe 9-Pb(II) complex displaying the trend in the absorption.

**Figure S23:** Time dependent spectra of probe 9-Cu(II) complex displaying the trend in the absorption.

**Figure S24:** Temperature dependent spectra of probe 6-Pb(II) complex displaying the trend in the absorption.

**Figure S25:** Temperature dependent spectra of probe 6-Cu(II) complex displaying the trend in the absorption.

**Figure S26:** Temperature dependent spectra of probe 9-Pb(II) complex displaying the trend in the absorption.

**Figure S27:** Temperature dependent spectra of probe 9-Cu(II) complex displaying the trend in the absorption.

**Figure S28:** Job's plot analysis of probe 6 on interaction with Pb(II) ions.

**Figure S29:** Job's plot analysis of probe 6 on interaction with Cu(II) ions.

**Figure S30:** Job's plot analysis of probe 9 on interaction with Pb(II) ions.

**Figure S31:** Job's plot analysis of probe 9 on interaction with Cu(II) ions.

**Figure S32:**  $^1\text{H-NMR}$  of probe 6 on interaction with the metal ion.

**Figure S33:**  $^1\text{H-NMR}$  of probe 9 on interaction with the metal ion.

**Table S1:** Cartesian co-ordinates of probe 6

**Table S2:** Cartesian co-ordinates of probe 9

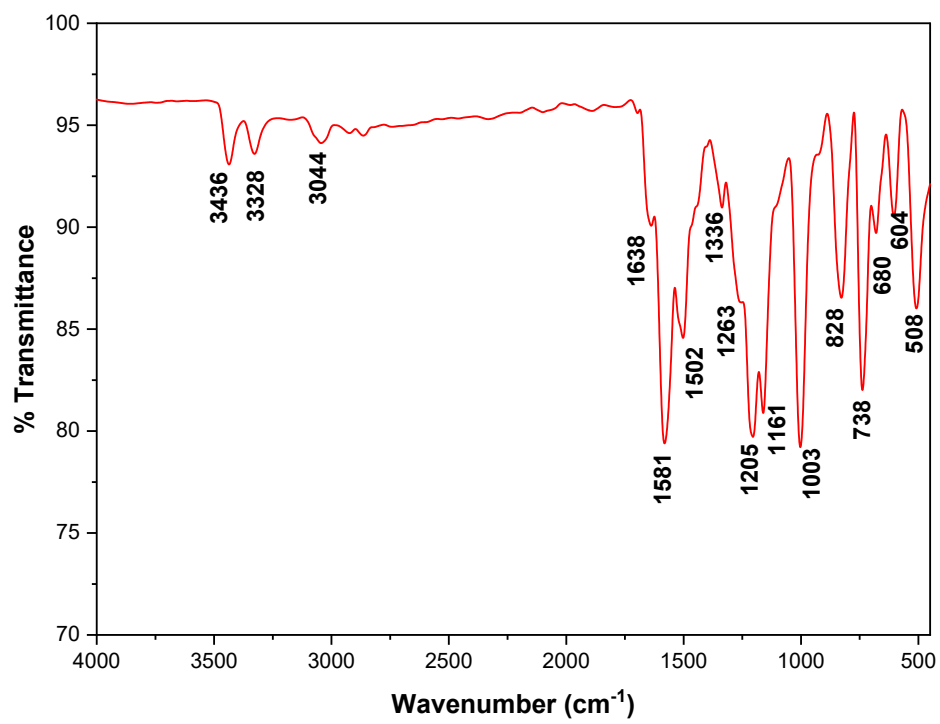

**Figure S1:** IR spectrum of chalcone 4

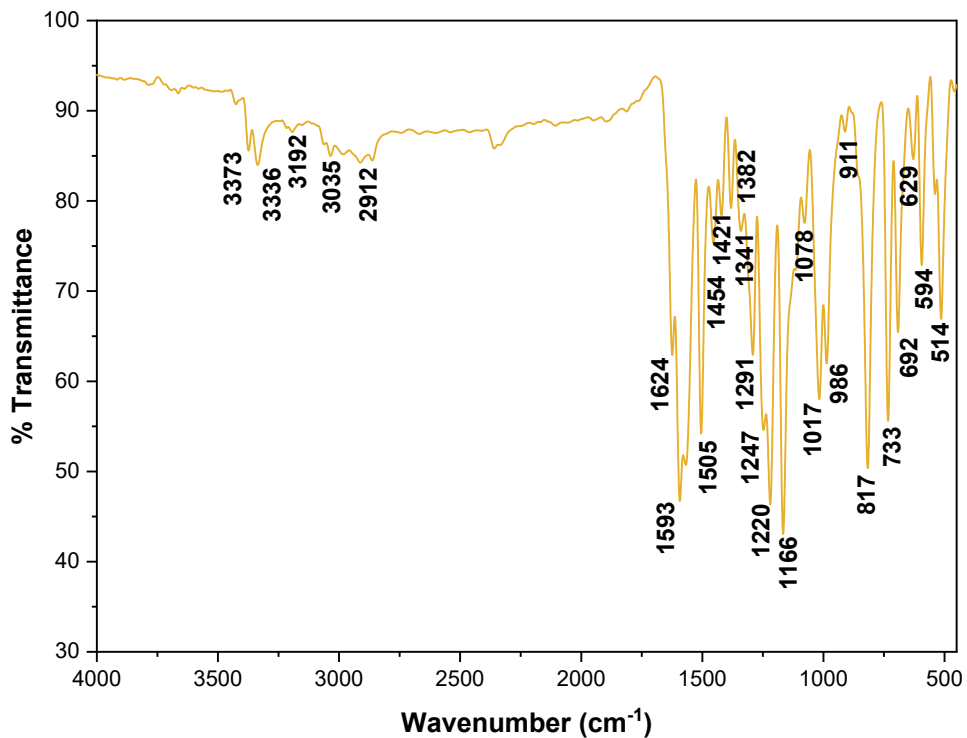

FigureS2: IR spectrum of chalcone 7

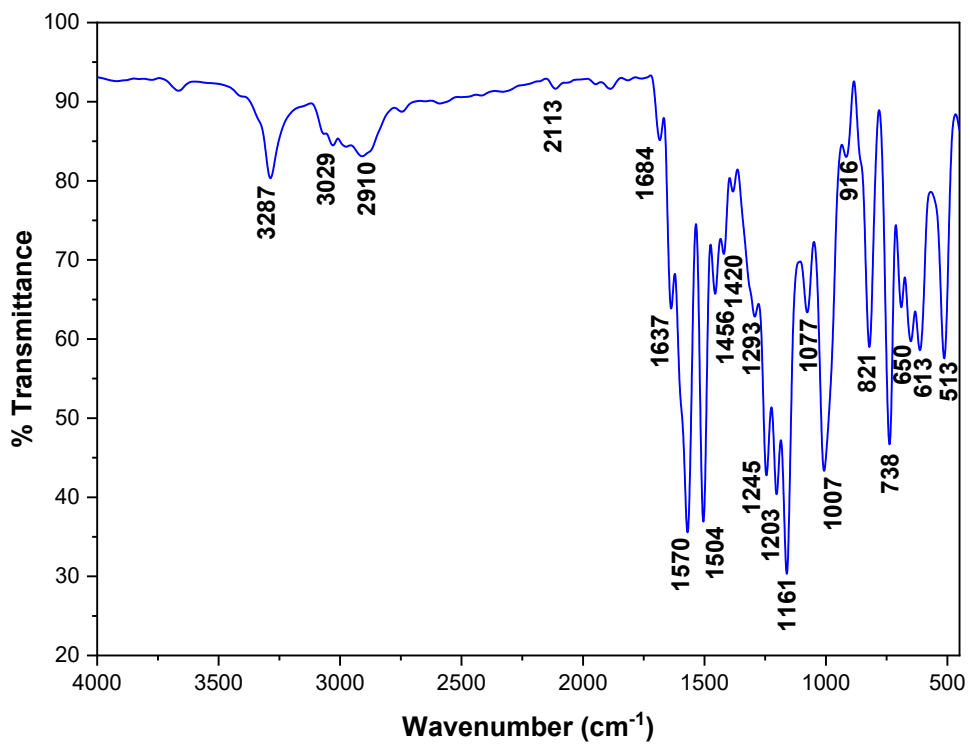

Figure S3: IR spectrum of alkyne 5

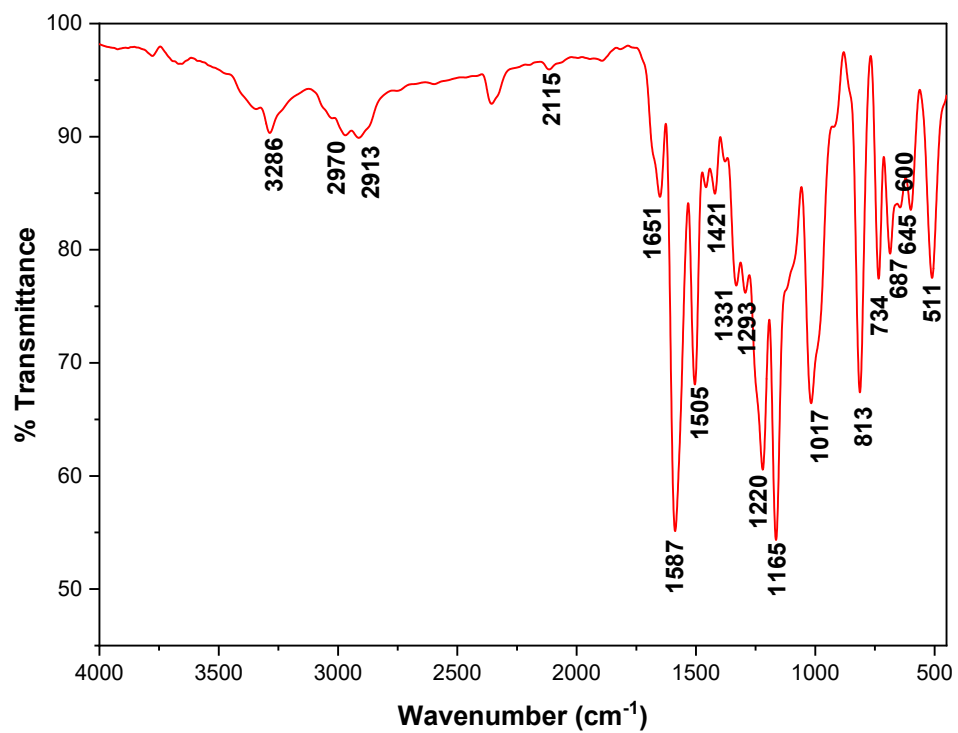

Figure S4: IR spectrum of alkyne 8

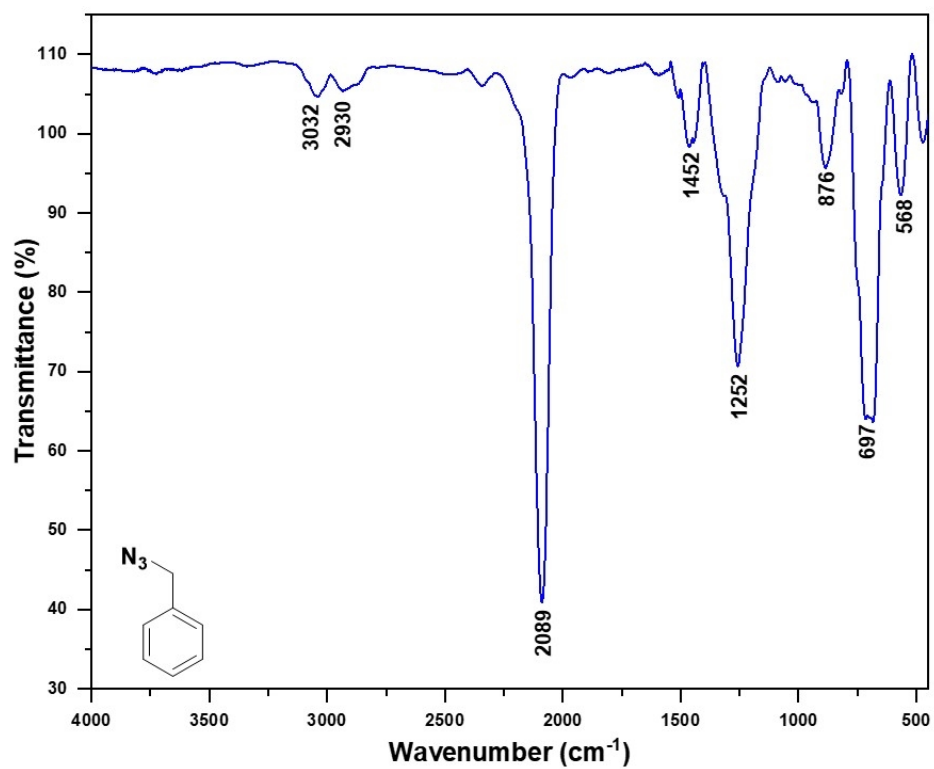

Figure S5: IR spectrum of benzyl azide 10

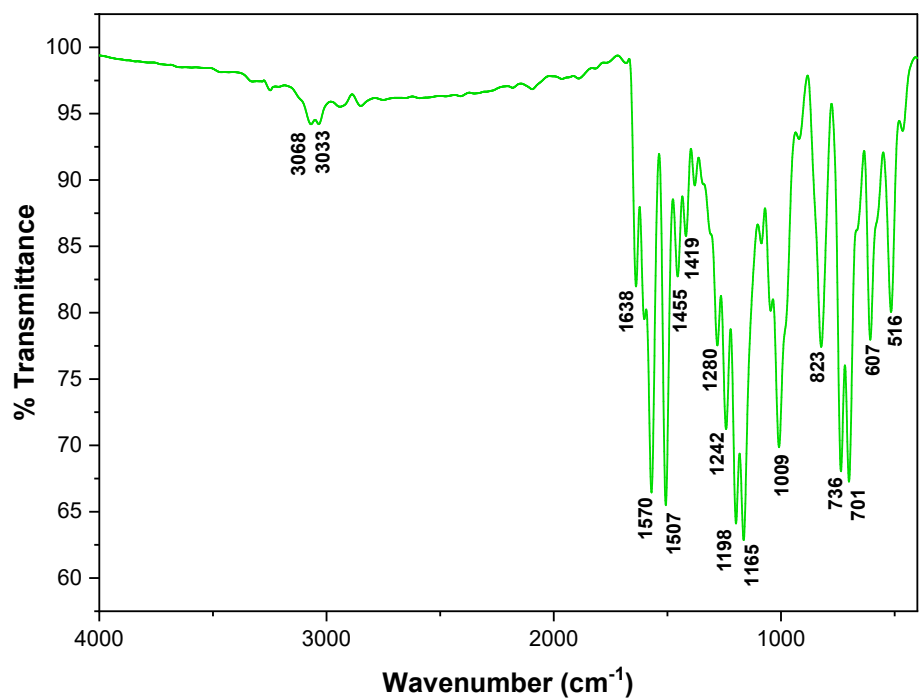

Figure S6: IR spectrum of probe 6

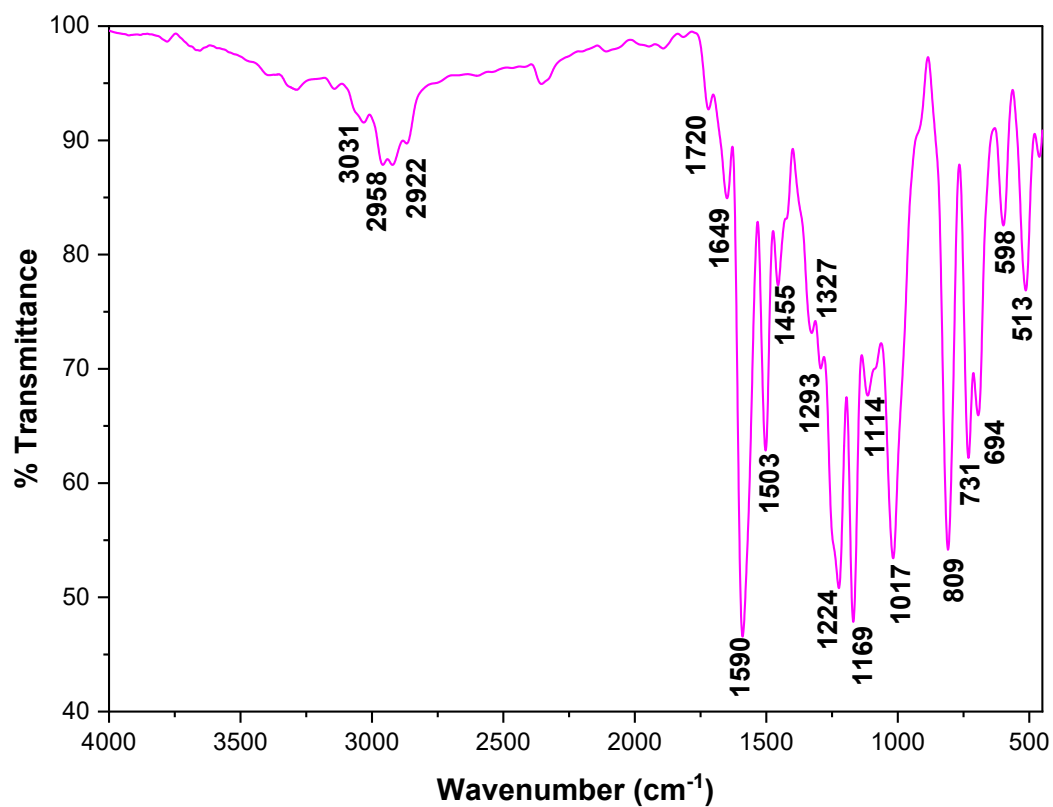

Figure S7: IR spectrum of probe 9

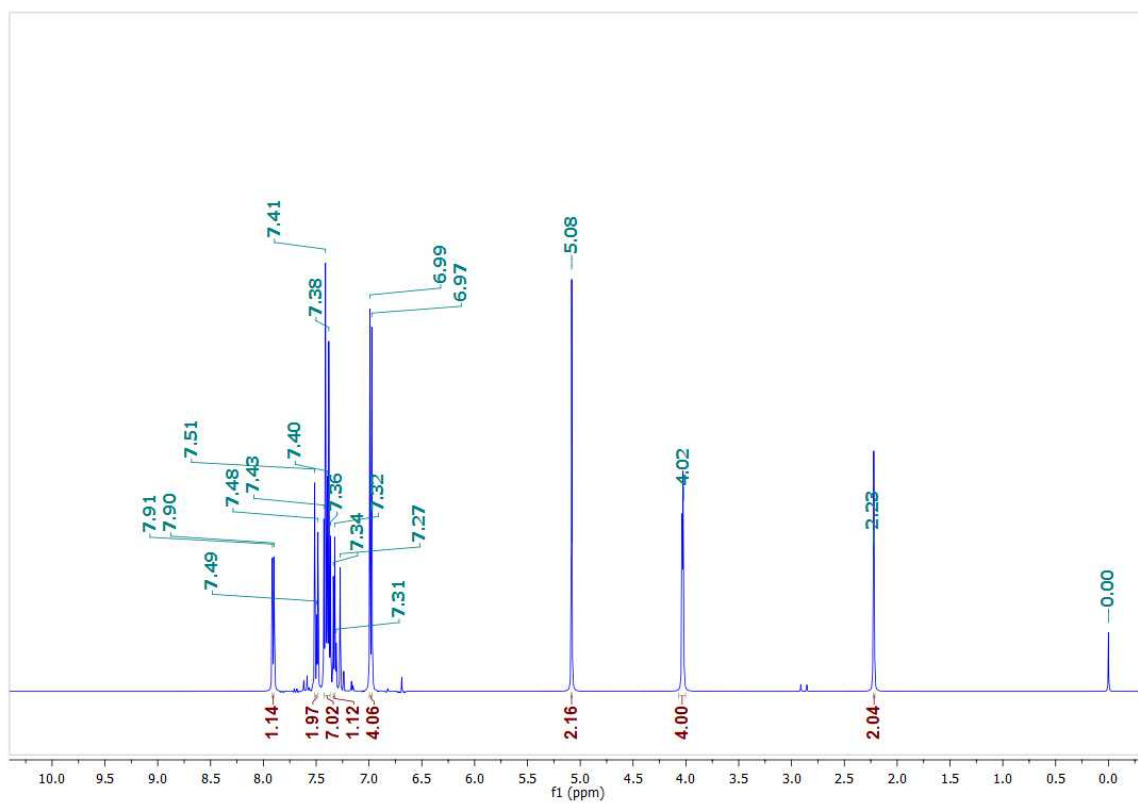

Figure S8:  $^1\text{H}$  NMR spectrum of alkyne 5

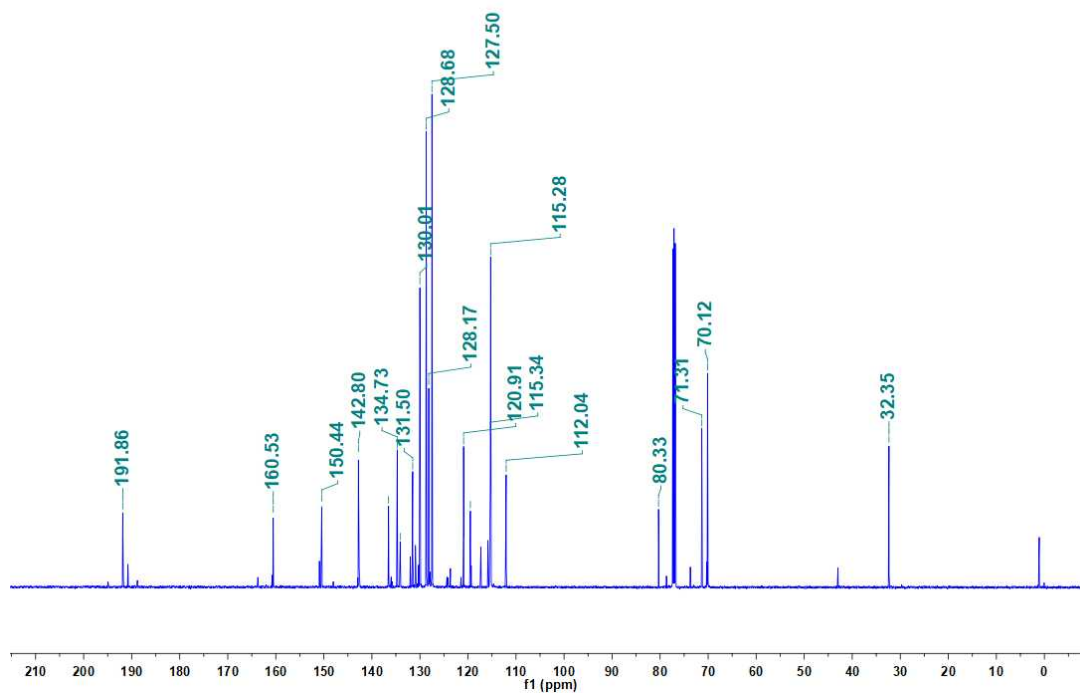

Figure S9:  $^{13}\text{C}$  NMR spectrum of alkyne 5



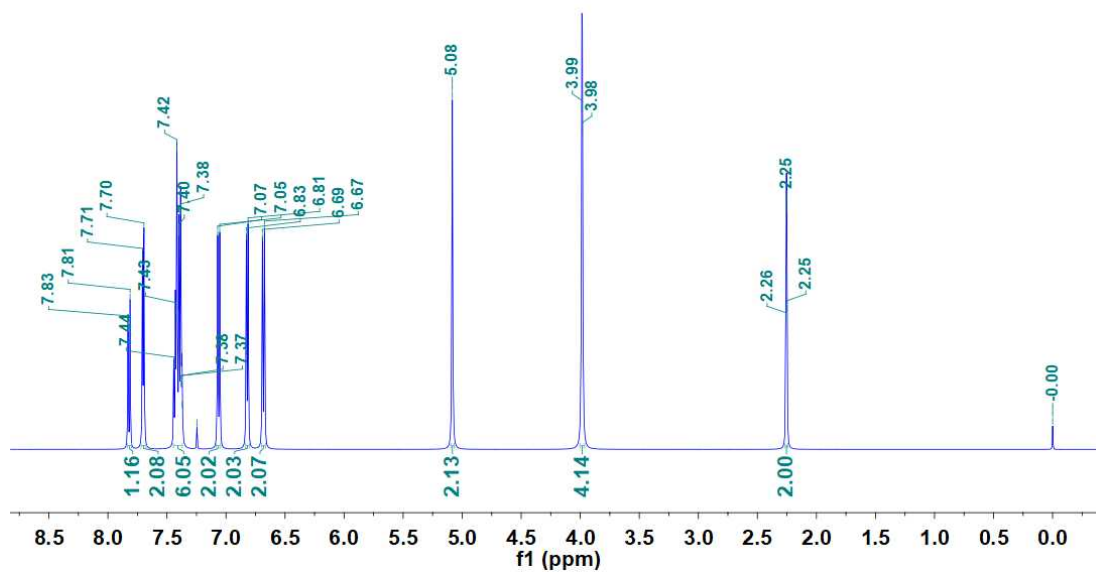

**Figure S10:**  $^1\text{H}$  NMR spectrum of alkyne 8

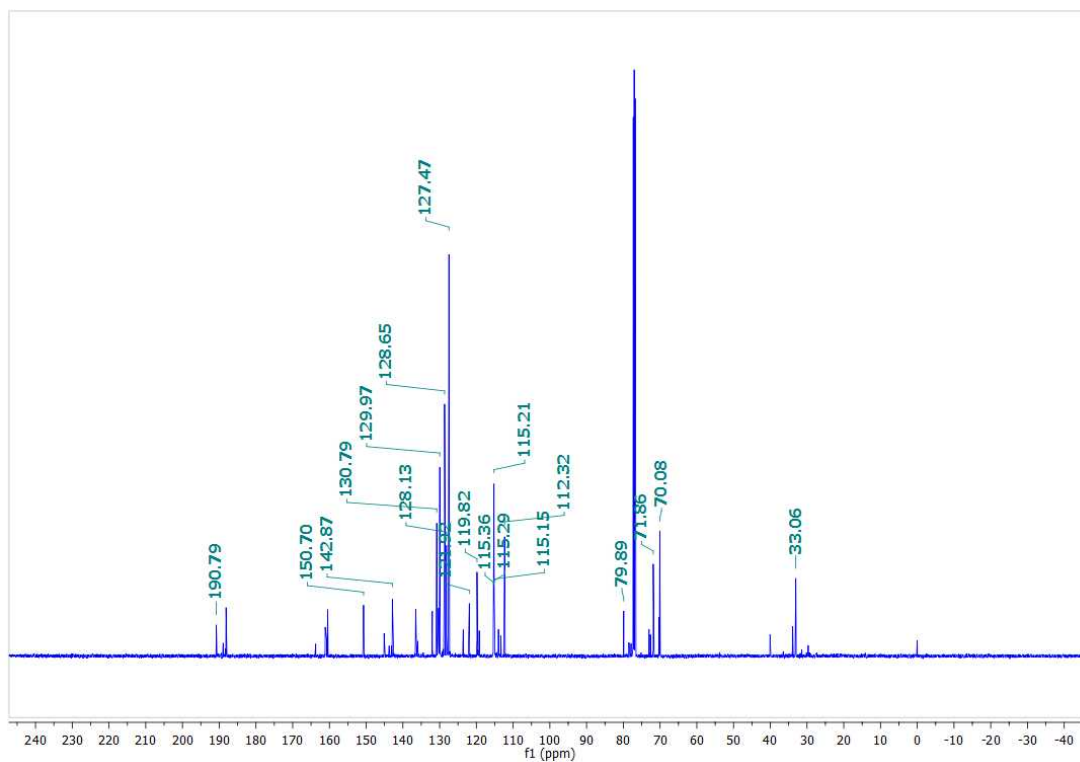

**Figure S11:**  $^{13}\text{C}$  NMR spectrum of alkyne 8

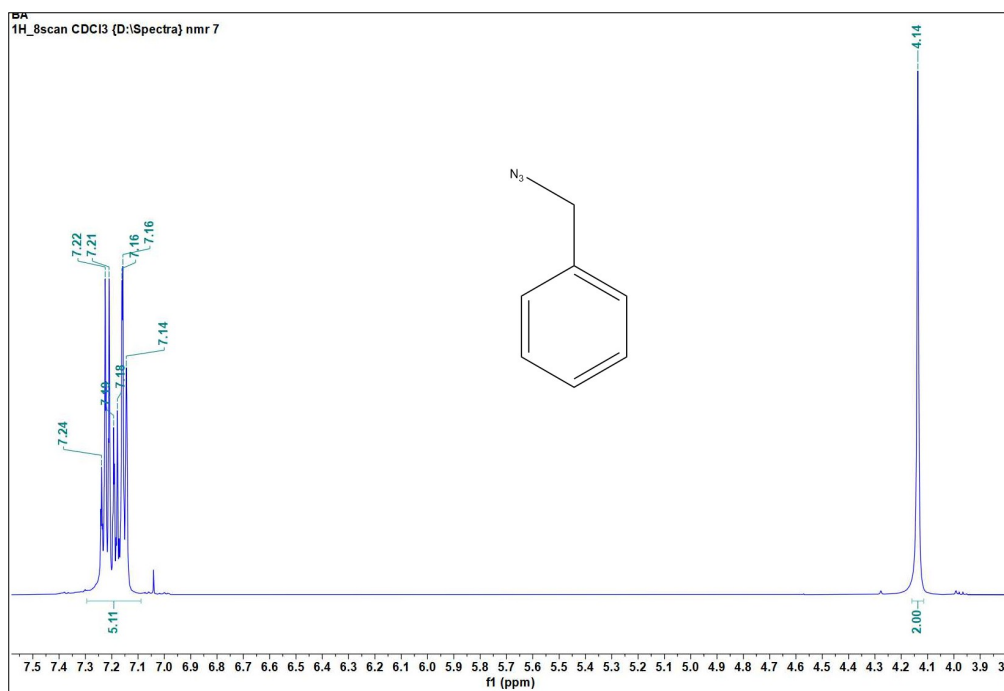

**Figure S12:**  $^1\text{H}$  NMR spectrum of benzyl azide 10

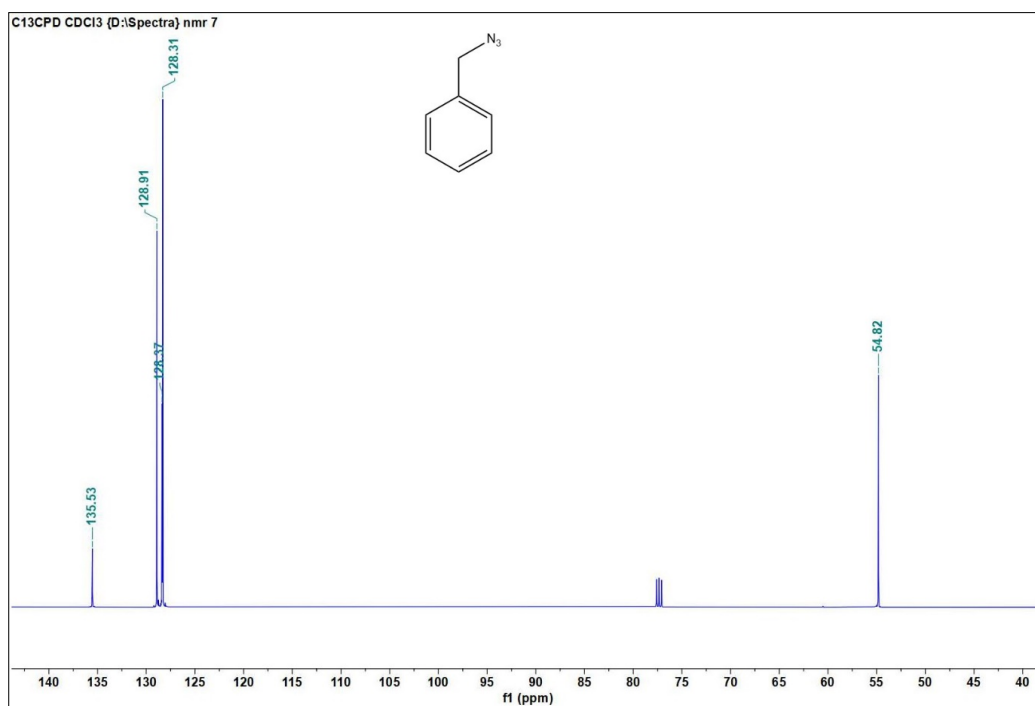

**Figure S13:**  $^{13}\text{C}$  NMR spectrum of benzyl azide 10

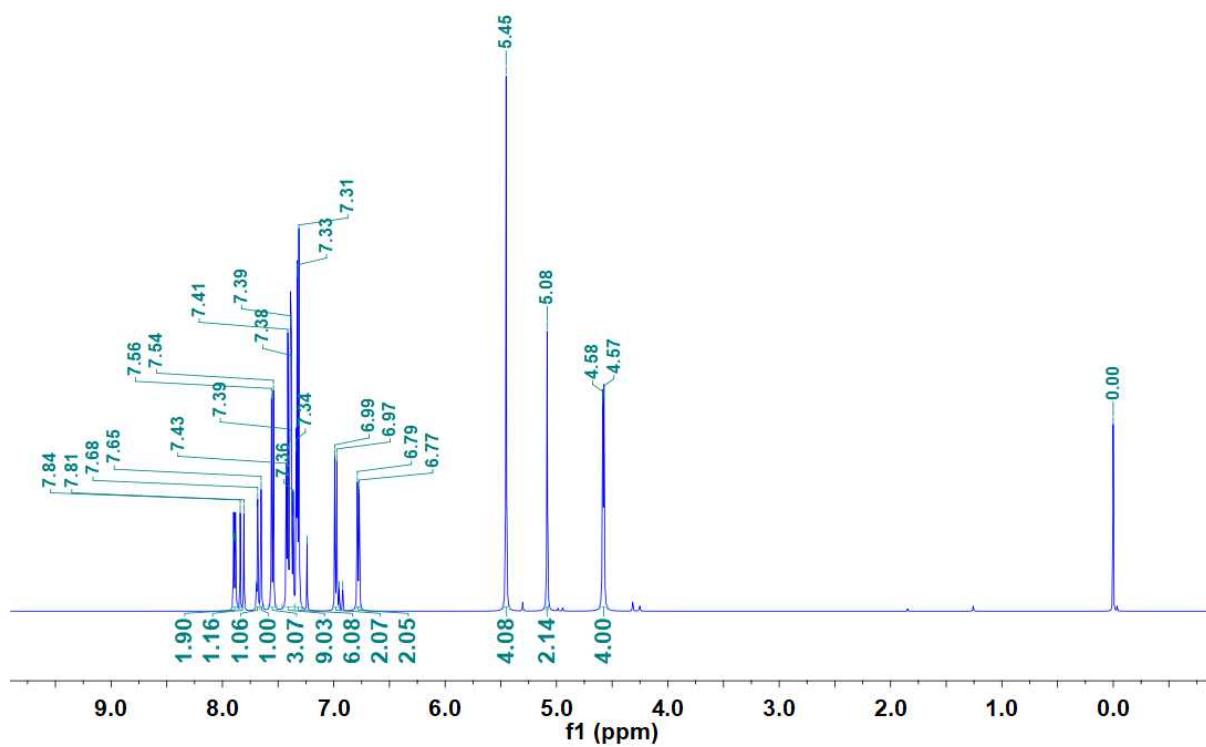

Figure S14:  $^1\text{H}$  NMR spectrum of probe 6

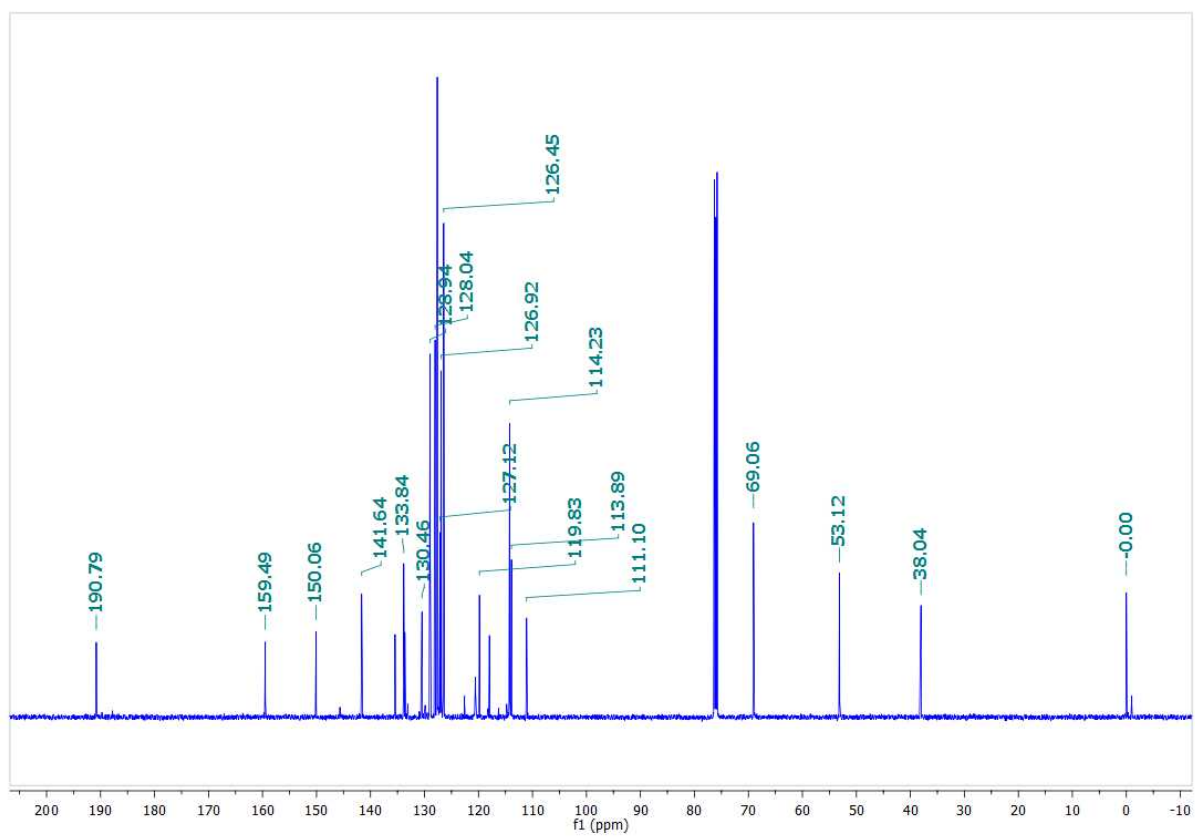

Figure S15:  $^{13}\text{C}$  NMR spectrum of probe 6

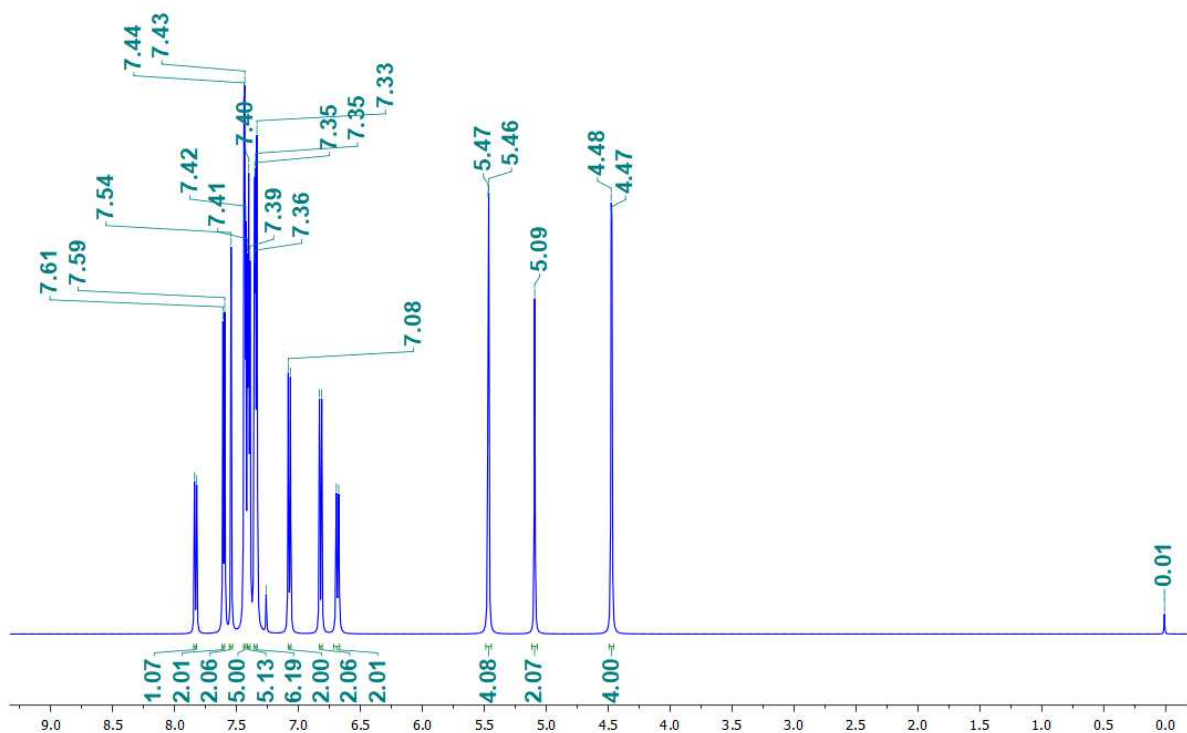

Figure S16: <sup>1</sup>H NMR spectrum of probe 9

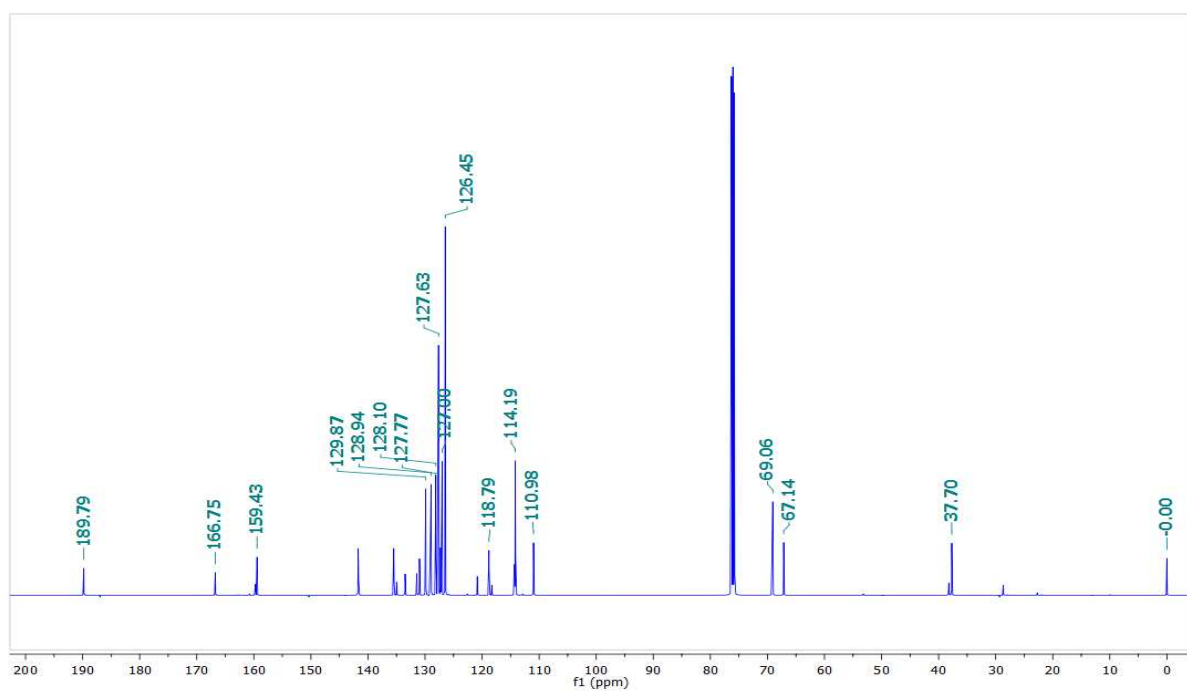

Figure S17: <sup>13</sup>C NMR spectrum of probe 9

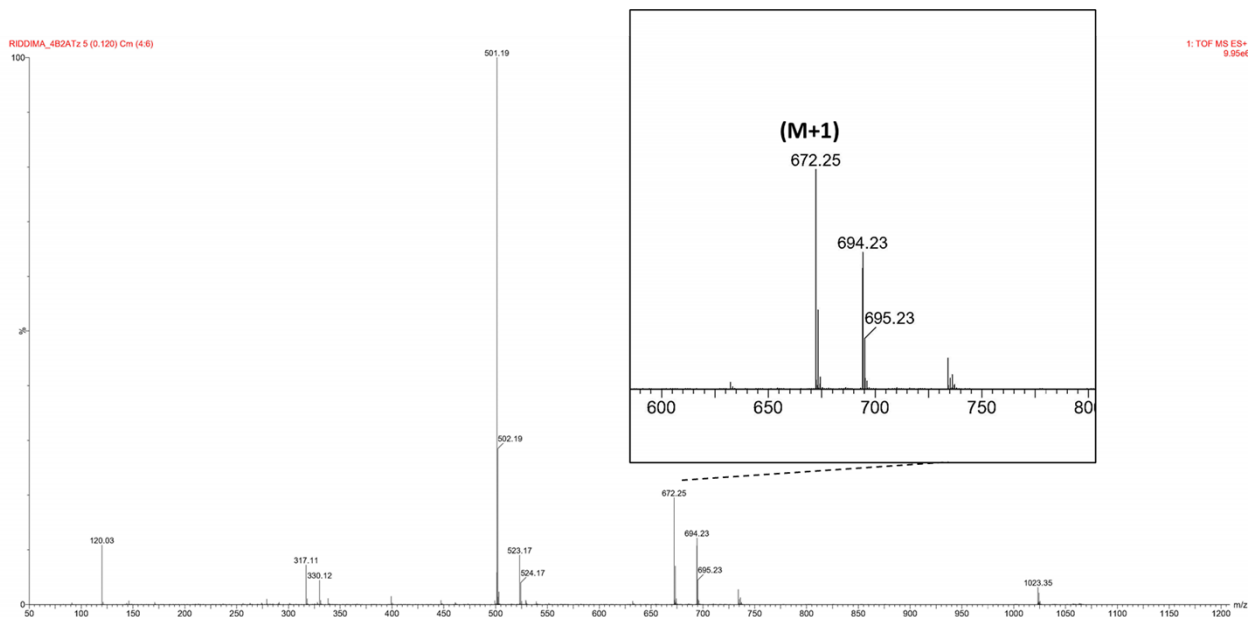

Figure S18: Mass spectrum of probe 6

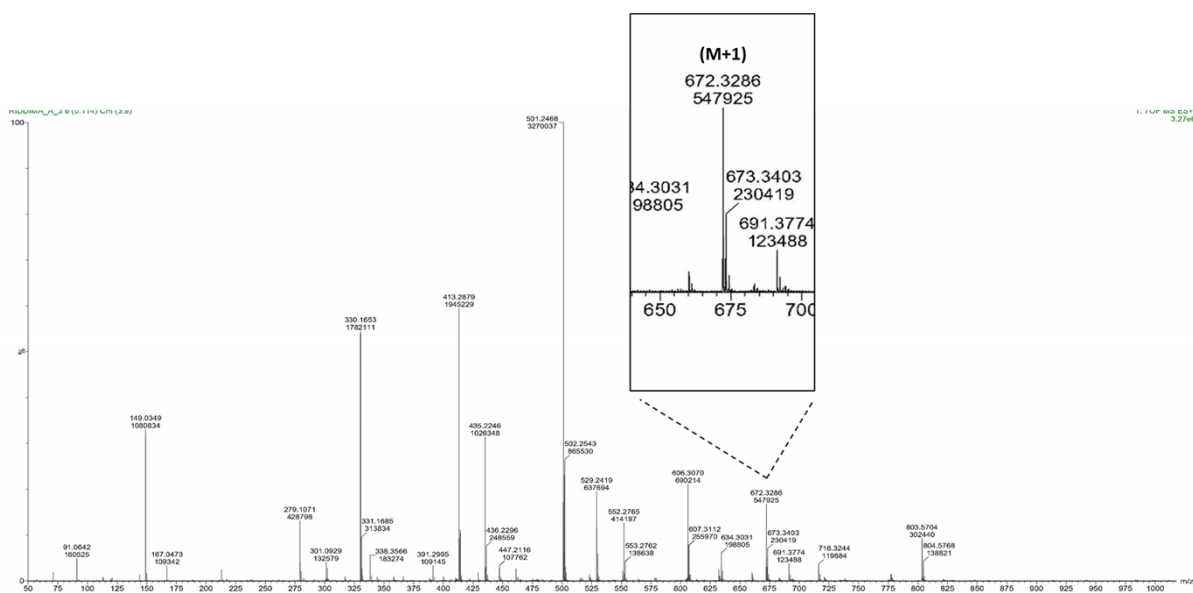

Figure S19: Mass spectrum of probe 9

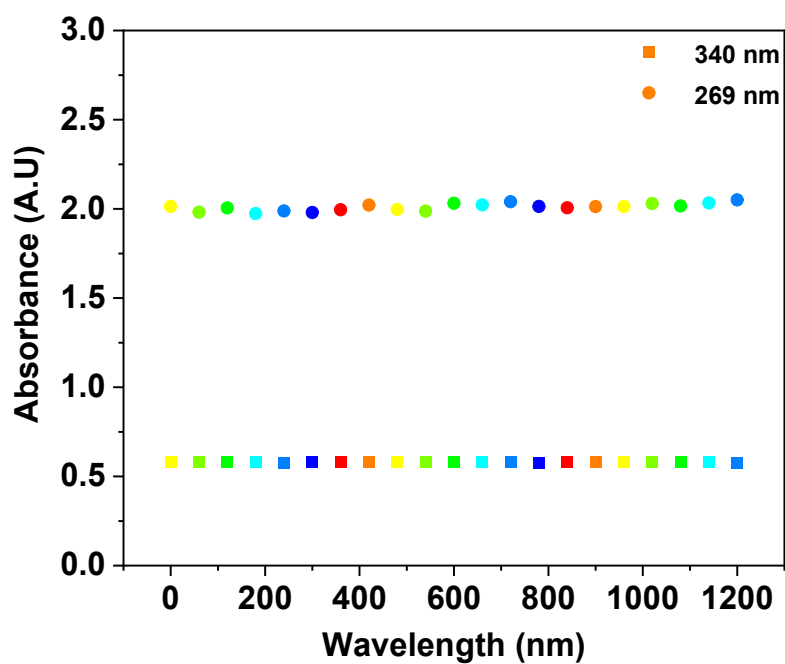

**Figure S20:** Time dependent spectra of probe 6-Pb(II) complex displaying the trend in the absorption.

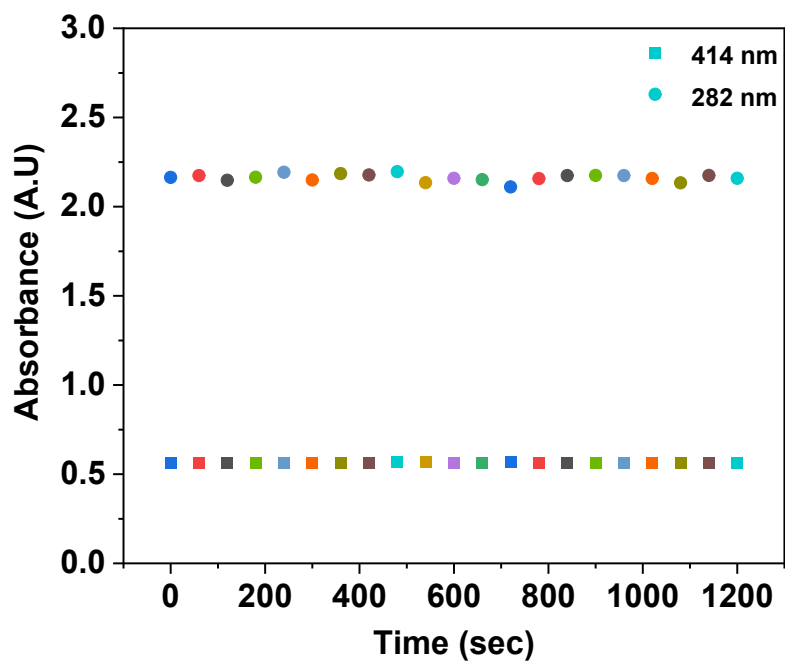

**Figure S21:** Time dependent spectra of probe 6-Cu(II) complex displaying the trend in the absorption.

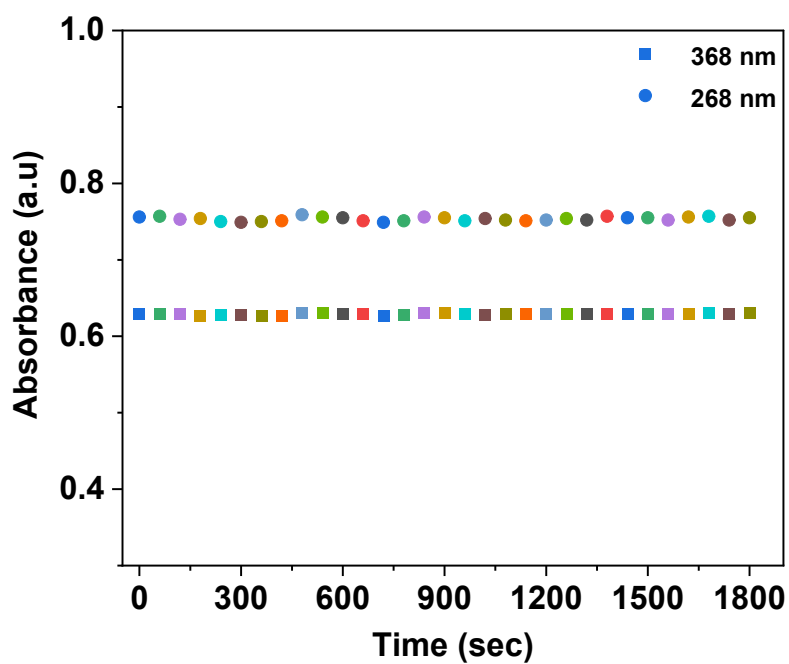

**Figure S22:** Time dependent spectra of probe 9-Pb(II) complex displaying the trend in the absorption.

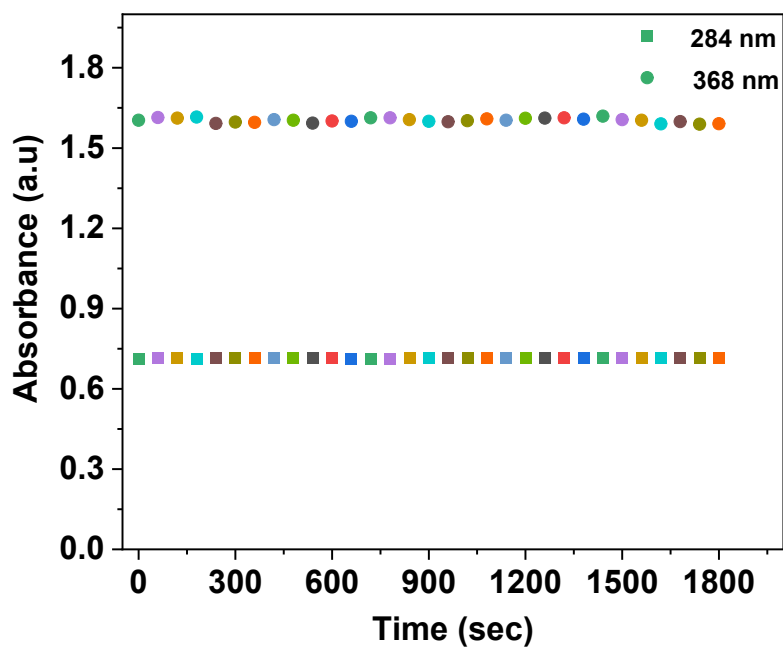

**Figure S23:** Time dependent spectra of probe 9-Cu(II) complex displaying the trend in the absorption.

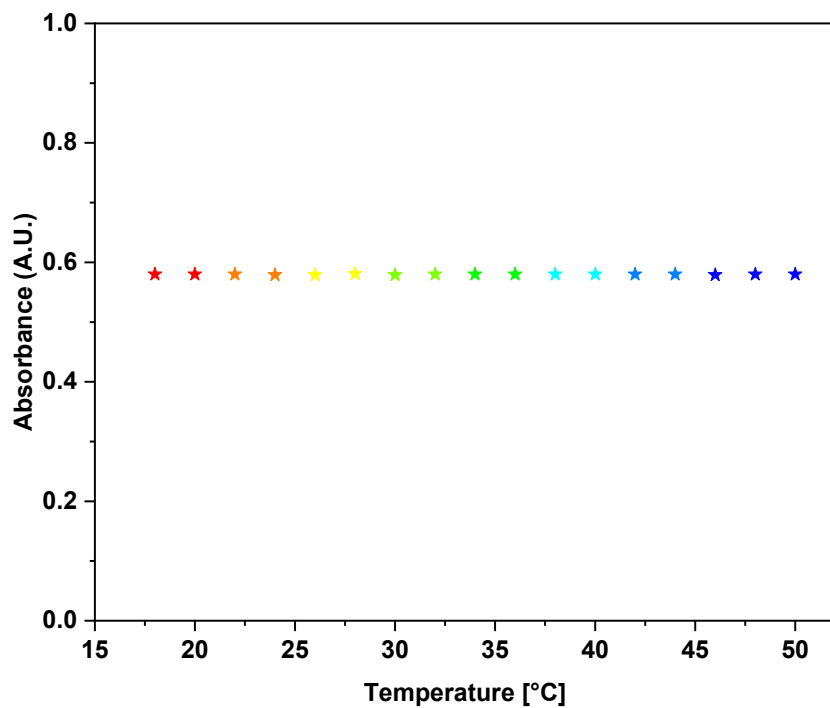

**Figure S24:** Temperature dependent spectra of probe 6-Pb(II) complex displaying the trend in the absorption.

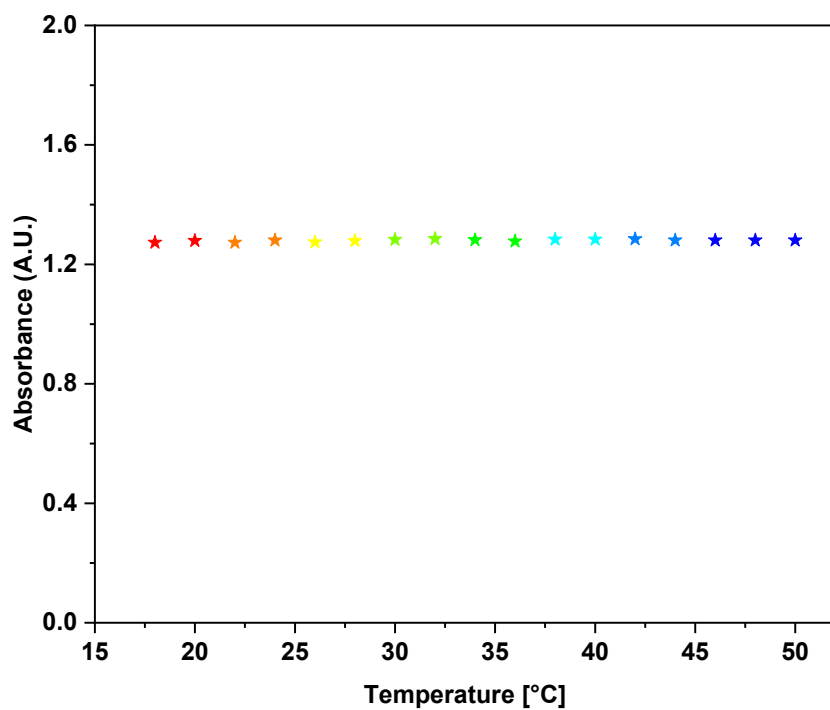

**Figure S25:** Temperature dependent spectra of probe 6-Cu(II) complex displaying the trend in the absorption.



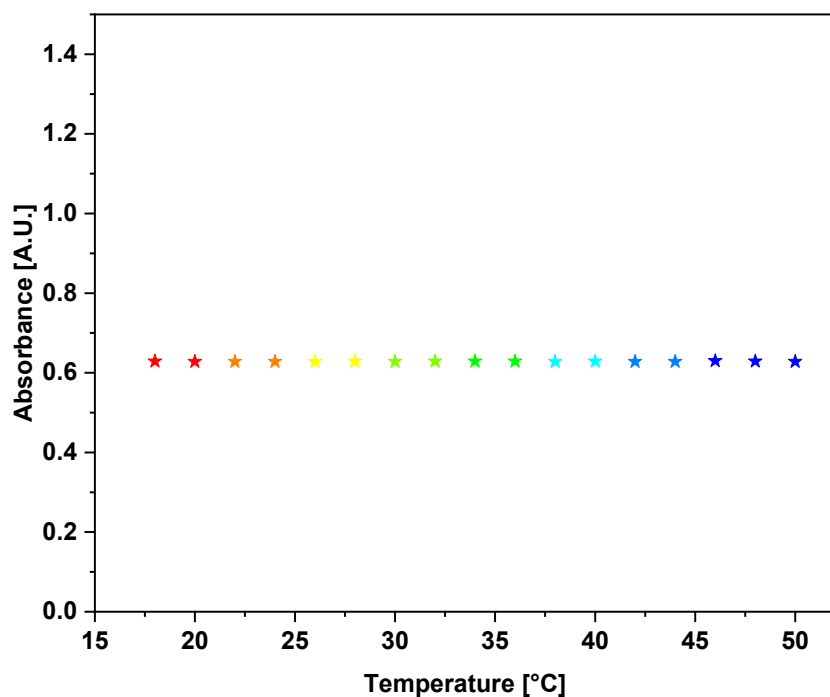

**Figure S26:** Temperature dependent spectra of probe 9-Pb(II) complex displaying the trend in the absorption.

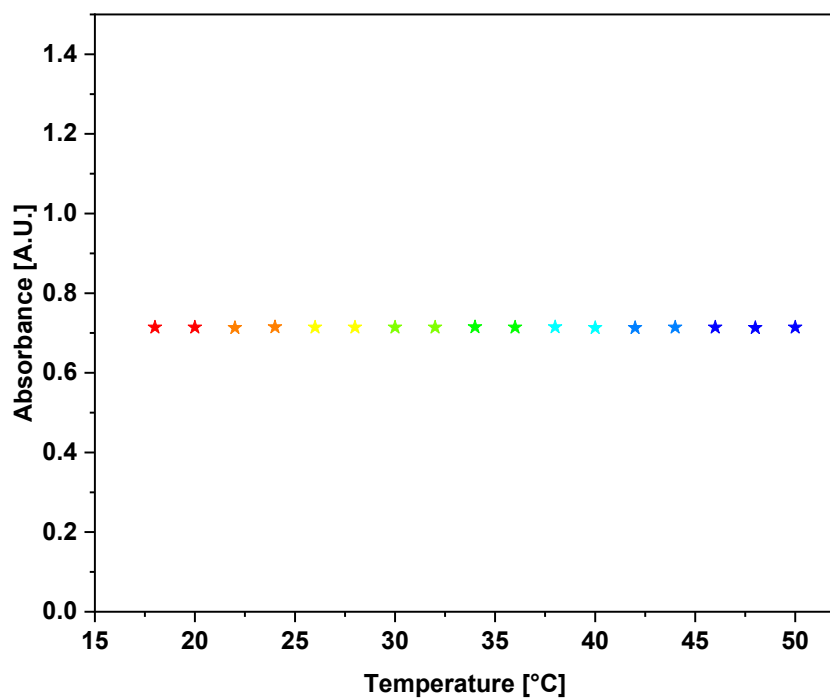

**Figure S27:** Temperature dependent spectra of probe 9-Cu(II) complex displaying the trend in the absorption.

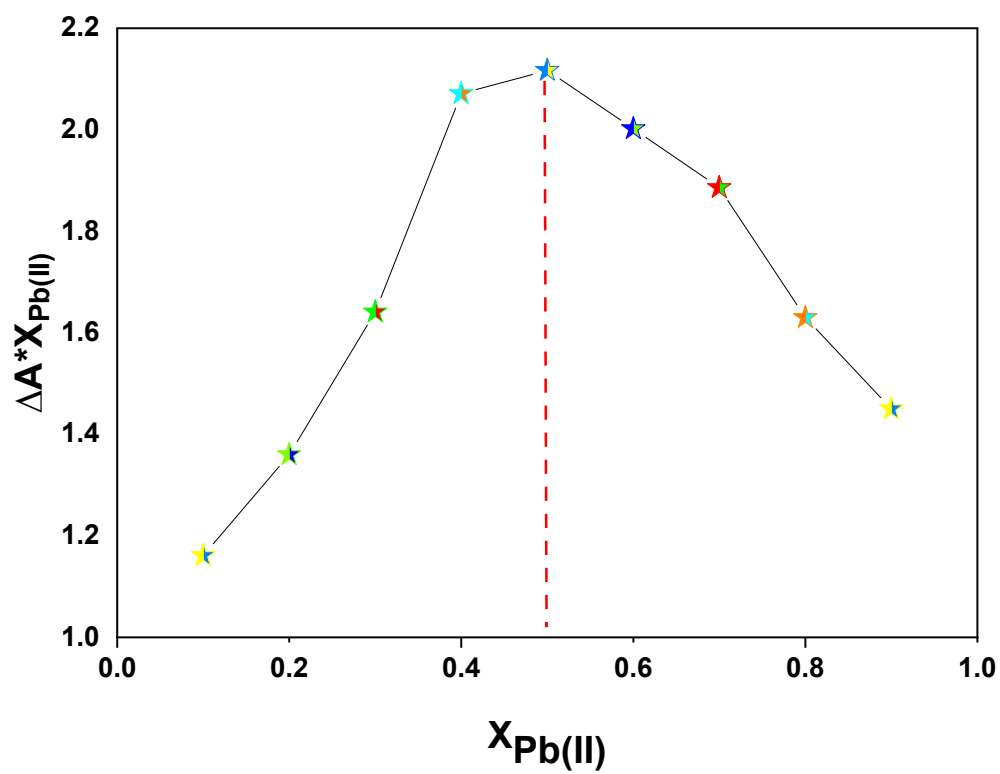

Figure S28: Job's plot analysis of probe 6 on interaction with Pb(II) ions.

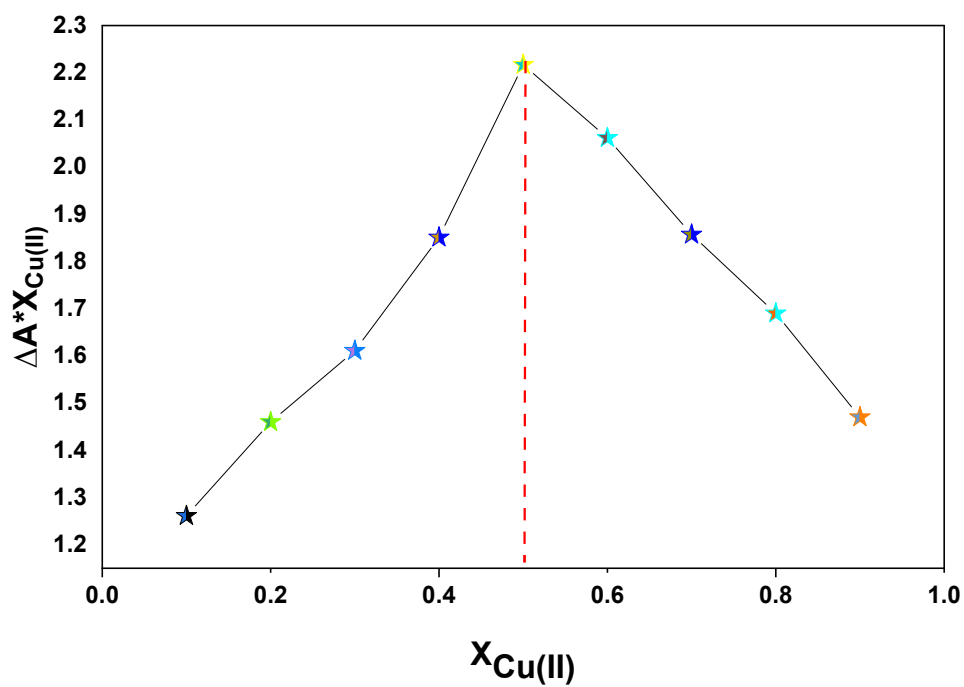

Figure S29: Job's plot analysis of probe 6 on interaction with Cu(II) ions.

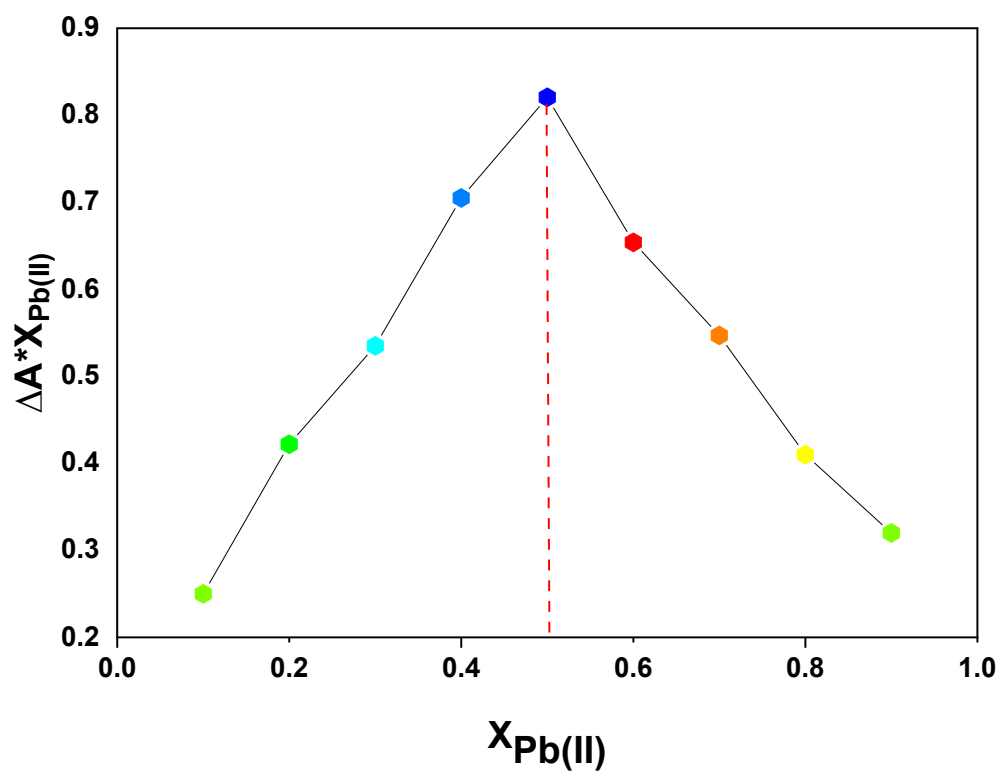

Figure S30: Job's plot analysis of probe 9 on interaction with Pb(II) ions.

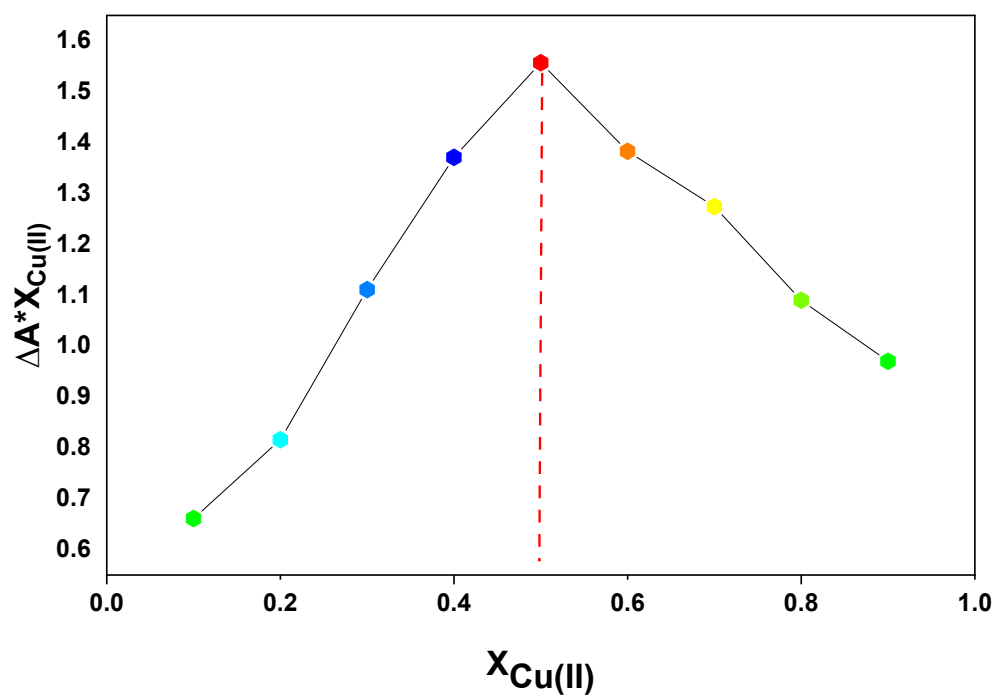

Figure S31: Job's plot analysis of probe 9 on interaction with Cu(II) ions.

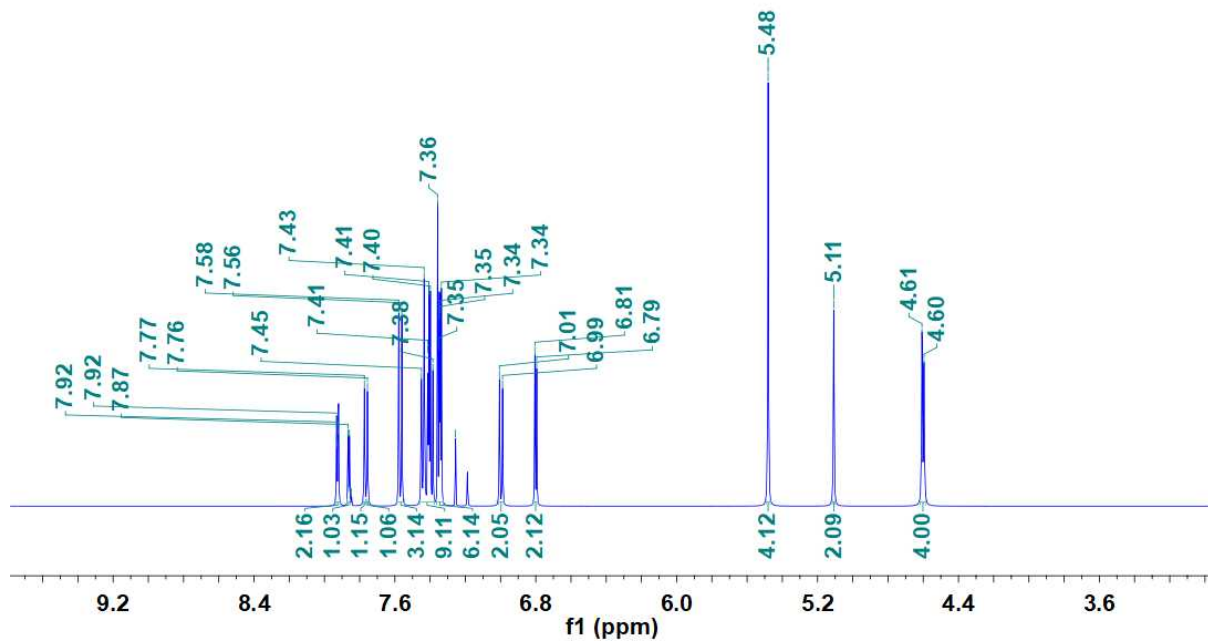

**Figure S32:**  $^1\text{H-NMR}$  of probe 6 on interaction with the metal ion.

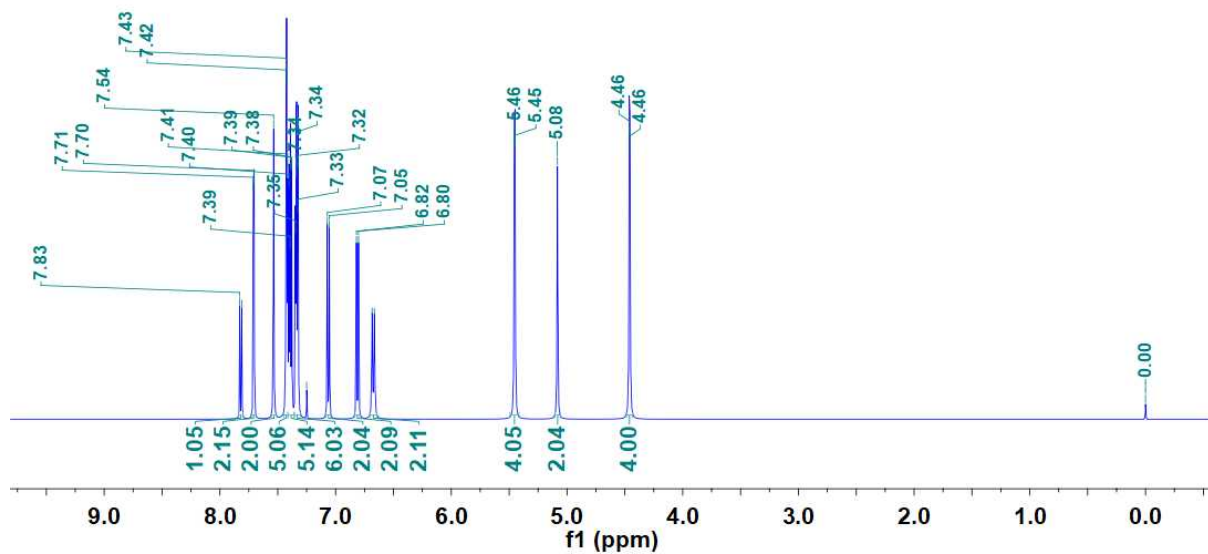

**Figure S33:**  $^1\text{H-NMR}$  of probe 9 on interaction with the metal ion.

| Symbol | X        | Y        | Z        |
|--------|----------|----------|----------|
| C      | 12.60647 | -1.54244 | 0.83657  |
| C      | 11.29011 | -1.46552 | 0.3736   |
| C      | 10.84751 | -0.32516 | -0.31641 |
| C      | 11.74121 | 0.734    | -0.53227 |
| C      | 13.06251 | 0.65323  | -0.07726 |
| C      | 13.4975  | -0.48536 | 0.60883  |
| H      | 12.93789 | -2.42537 | 1.37401  |
| H      | 10.5952  | -2.27708 | 0.55922  |
| H      | 11.40315 | 1.6255   | -1.05369 |
| H      | 13.74455 | 1.47959  | -0.25057 |
| H      | 14.52007 | -0.54812 | 0.96727  |
| C      | 9.4425   | -0.25149 | -0.85562 |
| H      | 9.18927  | 0.77608  | -1.14472 |
| H      | 9.31923  | -0.89666 | -1.73744 |
| O      | 8.52269  | -0.71291 | 0.18683  |
| C      | 7.16652  | -0.78823 | -0.09292 |
| C      | 6.58189  | -0.40685 | -1.3081  |
| C      | 6.36165  | -1.2847  | 0.94944  |
| C      | 5.19972  | -0.53128 | -1.46955 |
| H      | 7.18063  | -0.01723 | -2.12165 |
| C      | 4.99088  | -1.40192 | 0.77481  |
| H      | 6.84096  | -1.56774 | 1.87918  |
| C      | 4.37173  | -1.02952 | -0.44411 |
| H      | 4.74906  | -0.23716 | -2.41298 |
| H      | 4.38868  | -1.78604 | 1.59106  |
| C      | 2.93696  | -1.13624 | -0.68544 |
| H      | 2.58971  | -0.78972 | -1.65825 |
| C      | 1.98367  | -1.6129  | 0.14951  |
| C      | 0.55906  | -1.61915 | -0.25746 |
| H      | 2.23228  | -1.97261 | 1.14127  |
| C      | -0.41781 | -2.27942 | 0.6549   |

|   |          |          |          |
|---|----------|----------|----------|
| C | 0.02649  | -3.35816 | 1.44944  |
| C | -1.76055 | -1.81701 | 0.82597  |
| C | -0.7816  | -3.95283 | 2.4154   |
| H | 1.02808  | -3.74343 | 1.29331  |
| C | -2.54564 | -2.40246 | 1.8415   |
| C | -2.07035 | -3.45127 | 2.6267   |
| H | -0.41139 | -4.78979 | 2.9977   |
| H | -3.56246 | -2.05471 | 1.98247  |
| H | -2.7144  | -3.89368 | 3.38035  |
| O | 0.21037  | -1.04468 | -1.32258 |
| N | -2.29789 | -0.75609 | 0.04996  |
| C | -2.64251 | -1.03034 | -1.37782 |
| C | -3.1989  | 0.19406  | 0.73568  |
| H | -2.82955 | 0.30977  | 1.75973  |
| H | -4.23824 | -0.16312 | 0.80054  |
| H | -2.56091 | -0.08728 | -1.92467 |
| H | -1.88094 | -1.69405 | -1.77773 |
| C | -3.22951 | 1.52138  | 0.04444  |
| C | -2.21394 | 2.43716  | -0.17915 |
| C | -4.00051 | -1.63516 | -1.5719  |
| C | -5.25092 | -1.03063 | -1.60441 |
| N | -2.79575 | 3.45577  | -0.87567 |
| N | -4.14217 | 3.19608  | -1.08625 |
| N | -4.38935 | 2.01532  | -0.52635 |
| N | -4.17361 | -2.99857 | -1.75546 |
| N | -5.46532 | -3.26509 | -1.90465 |
| N | -6.13545 | -2.0479  | -1.8126  |
| H | -5.53529 | 0.00326  | -1.48317 |
| H | -1.17041 | 2.4185   | 0.0822   |
| C | -2.21863 | 4.71874  | -1.34821 |
| C | -7.59915 | -2.02093 | -1.86958 |
| C | -1.99834 | 5.73002  | -0.23758 |

|   |           |          |          |
|---|-----------|----------|----------|
| C | -3.06597  | 6.11693  | 0.59004  |
| C | -0.73493  | 6.30544  | -0.04216 |
| C | -2.86742  | 7.06376  | 1.59822  |
| H | -4.04441  | 5.66923  | 0.44281  |
| C | -0.53719  | 7.25855  | 0.96475  |
| H | 0.09576   | 6.00988  | -0.67763 |
| C | -1.60276  | 7.63791  | 1.78711  |
| H | -3.69699  | 7.35575  | 2.23423  |
| H | 0.44521   | 7.69732  | 1.10734  |
| H | -1.45108  | 8.37412  | 2.56998  |
| C | -8.25291  | -2.00924 | -0.49849 |
| C | -7.99254  | -3.04391 | 0.41629  |
| C | -9.13428  | -0.98052 | -0.13784 |
| C | -8.60688  | -3.04461 | 1.67142  |
| H | -7.30261  | -3.83561 | 0.13963  |
| C | -9.75284  | -0.98315 | 1.11867  |
| H | -9.33628  | -0.17436 | -0.83798 |
| C | -9.48983  | -2.01493 | 2.02521  |
| H | -8.4002   | -3.84759 | 2.37209  |
| H | -10.43202 | -0.18029 | 1.38758  |
| H | -9.96705  | -2.01813 | 3.00017  |
| H | -7.90394  | -1.14555 | -2.44994 |
| H | -7.88294  | -2.91639 | -2.4301  |
| H | -1.27878  | 4.49789  | -1.86258 |
| H | -2.93033  | 5.09392  | -2.08921 |

**Table S1:** Cartesian co-ordinates of probe 6

| Symbol | X         | Y        | Z        |
|--------|-----------|----------|----------|
| C      | -14.26535 | -0.53299 | -0.77069 |
| C      | -14.17929 | -0.74864 | -2.15008 |
| C      | -12.93176 | -0.97455 | -2.73389 |
| C      | -11.77345 | -0.98896 | -1.94943 |

|   |           |          |          |
|---|-----------|----------|----------|
| C | -11.85465 | -0.77336 | -0.56991 |
| C | -13.11005 | -0.54317 | 0.01143  |
| C | -8.24273  | -0.87368 | 0.17232  |
| C | -7.11848  | -0.94704 | -0.67002 |
| C | -5.84254  | -0.95953 | -0.13198 |
| C | -5.6319   | -0.89806 | 1.26457  |
| C | -6.77048  | -0.82497 | 2.08454  |
| C | -8.06465  | -0.81308 | 1.55968  |
| C | -4.31139  | -0.90867 | 1.88764  |
| C | -3.10483  | -0.96292 | 1.28312  |
| C | -1.85882  | -0.98307 | 2.09074  |
| C | -0.54142  | -1.01082 | 1.39335  |
| O | -1.90713  | -0.98615 | 3.32597  |
| C | -0.36556  | -0.84927 | 0.00689  |
| C | 0.89469   | -0.86387 | -0.57637 |
| C | 2.06581   | -1.06081 | 0.19724  |
| C | 1.8847    | -1.21506 | 1.59536  |
| C | 0.61948   | -1.18977 | 2.16461  |
| N | 3.32504   | -1.12623 | -0.39767 |
| C | 3.57982   | -0.34939 | -1.61958 |
| C | 4.49148   | -1.38643 | 0.46782  |
| C | 5.71989   | -1.82865 | -0.2672  |
| C | 3.73018   | 1.12989  | -1.38175 |
| C | 6.82878   | -1.10293 | -0.65838 |
| N | 7.64238   | -2.01532 | -1.24322 |
| N | 7.07764   | -3.24743 | -1.21237 |
| N | 5.91953   | -3.13392 | -0.62413 |
| C | 2.79798   | 2.14846  | -1.43928 |
| N | 3.48101   | 3.26126  | -1.07059 |
| N | 4.76843   | 2.96112  | -0.79574 |
| N | 4.92022   | 1.67661  | -0.9822  |
| C | 8.97915   | -1.84008 | -1.81303 |



|   |           |          |          |
|---|-----------|----------|----------|
| C | 10.05175  | -1.59748 | -0.76802 |
| C | 10.81596  | -0.4256  | -0.79448 |
| C | 11.81778  | -0.20856 | 0.15731  |
| C | 12.05812  | -1.16303 | 1.14713  |
| C | 11.2959   | -2.33618 | 1.18053  |
| C | 10.30053  | -2.55387 | 0.22753  |
| C | 3.01556   | 4.64873  | -0.97411 |
| C | 1.76317   | 4.7936   | -0.13405 |
| C | 0.59255   | 5.31762  | -0.69405 |
| C | -0.56373  | 5.46056  | 0.08018  |
| C | -0.55786  | 5.07286  | 1.42095  |
| C | 0.60909   | 4.54817  | 1.98765  |
| C | 1.76316   | 4.41314  | 1.21627  |
| H | -15.23013 | -0.3532  | -0.30508 |
| H | -15.07682 | -0.73825 | -2.76151 |
| H | -12.85454 | -1.14132 | -3.8046  |
| H | -10.80626 | -1.16396 | -2.40605 |
| H | -13.186   | -0.36994 | 1.08303  |
| H | -7.27596  | -0.99553 | -1.74265 |
| H | -4.99374  | -1.02118 | -0.80569 |
| H | -6.64123  | -0.77935 | 3.16265  |
| H | -8.91063  | -0.7587  | 2.23392  |
| H | -4.29743  | -0.87123 | 2.97618  |
| H | -3.02705  | -1.01063 | 0.20283  |
| H | -1.21847  | -0.6996  | -0.64634 |
| H | 0.95899   | -0.74928 | -1.65144 |
| H | 2.73639   | -1.33981 | 2.25093  |
| H | 0.50646   | -1.29826 | 3.23836  |
| H | 4.49873   | -0.72971 | -2.06674 |
| H | 2.78663   | -0.53822 | -2.34306 |
| H | 4.73504   | -0.50379 | 1.07776  |
| H | 4.21911   | -2.19962 | 1.14329  |

|   |           |          |          |
|---|-----------|----------|----------|
| H | 1.7466    | 2.16343  | -1.67915 |
| H | 9.17147   | -2.76074 | -2.3703  |
| H | 8.94515   | -1.01118 | -2.52596 |
| H | 10.62913  | 0.32249  | -1.56139 |
| H | 12.40369  | 0.70542  | 0.1255   |
| H | 12.83358  | -0.99589 | 1.88897  |
| H | 11.47966  | -3.08271 | 1.94776  |
| H | 9.70805   | -3.46459 | 0.25661  |
| H | 2.84368   | 5.03375  | -1.9846  |
| H | 3.85798   | 5.19689  | -0.54417 |
| H | 0.58249   | 5.61706  | -1.7395  |
| H | -1.46576  | 5.86825  | -0.36668 |
| H | -1.45627  | 5.17437  | 2.02233  |
| H | 0.61763   | 4.24159  | 3.02929  |
| H | 2.66642   | 4.00205  | 1.65962  |
| H | 7.05891   | -0.05094 | -0.58595 |
| O | -9.45299  | -0.87456 | -0.45845 |
| C | -10.63783 | -0.79901 | 0.32925  |
| H | -10.6123  | 0.1063   | 0.9519   |
| H | -10.68444 | -1.66802 | 1.00241  |

**Table S2:** Cartesian co-ordinates of probe 9
